# Supplementary material for: Enhanced permanganate chemiluminescence
Source: Royal Society of Chemistry journal article supplement (doi:10.1039/c0an00588f), 2010-10-07
Supplement: c0an00588f.pdf [file c0an00588f.pdf]

Electronic Supplementary Information for:

## Enhanced Permanganate Chemiluminescence

Paul S. Francis,\* Christopher M. Hindson, Jessica M. Terry, Zoe M. Smith,  
Teo Slezak, Jacqui L. Adcock, Bronwyn L. Fox and Neil W. Barnett

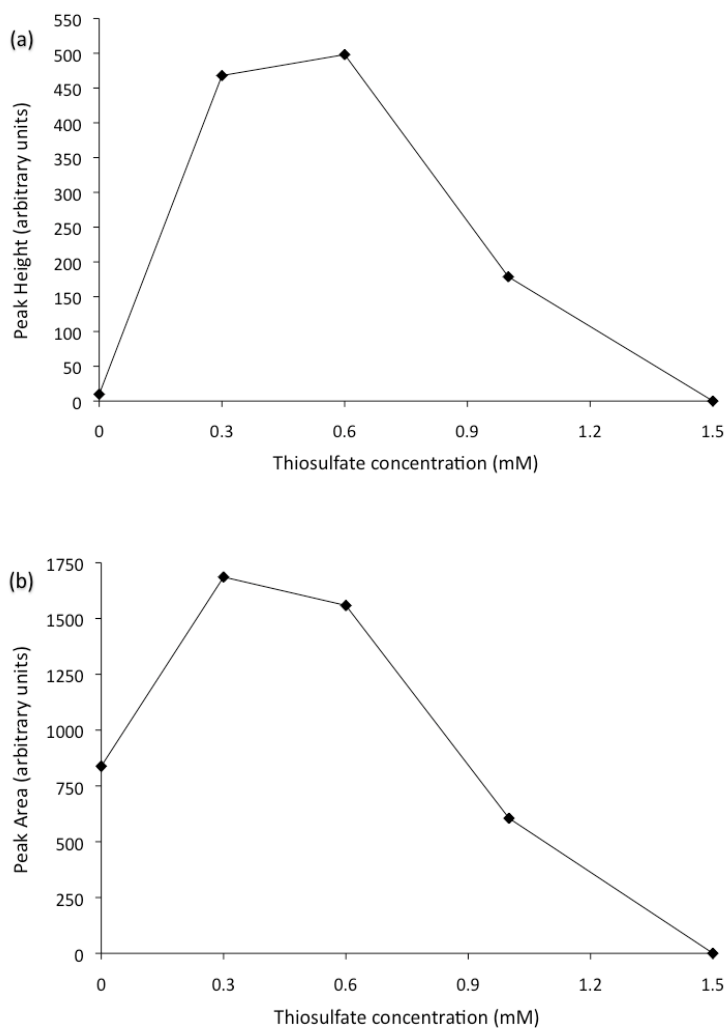

**Fig. S1** (a) Peak heights and (b) peak areas for the intensity versus time profiles for 10  $\mu$ M synephrine with reagents prepared from 1.9 mM potassium permanganate and various concentrations of sodium thiosulfate, using stopped-flow methodology. Each reagent contained 1% (m/v) sodium polyphosphate and was adjusted to pH 2.5 with  $\text{H}_2\text{SO}_4$  prior to the addition of sodium thiosulfate (i.e. adding an appropriate volume of a 0.1 M sodium thiosulfate solution to 100 mL of the reagent).

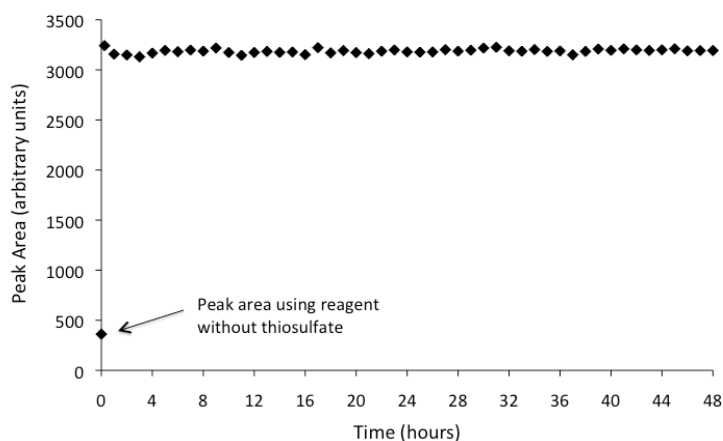

**Fig. S2** Stability of permanganate reagent prepared from 1.9 mM potassium permanganate and 0.6 mM sodium thiosulfate (containing 1% (m/v) sodium polyphosphate and adjusted to pH 2.5 prior to the addition of thiosulfate). Each point represents an average of five chemiluminescence signals with 1  $\mu$ M morphine, using automated sequential injection analysis instrumentation.
